# Supplementary material
Source: publisher figshare collection journal article supplement (https://acs.figshare.com/ndownloader/files/4512487)

**Figure S2.** Classification of the differentially expressed proteins in PCV2-infected PK15 cells according to subcellular location and biological function. *A* and *C* show functional classification of the differentially expressed proteins in PCV2-infected PK15 cells. *B* and *D* indicate subcellular location of the differentially expressed proteins in PCV2-infected PK15 cells.

**A. Functional classification of up-regulated protein spots**

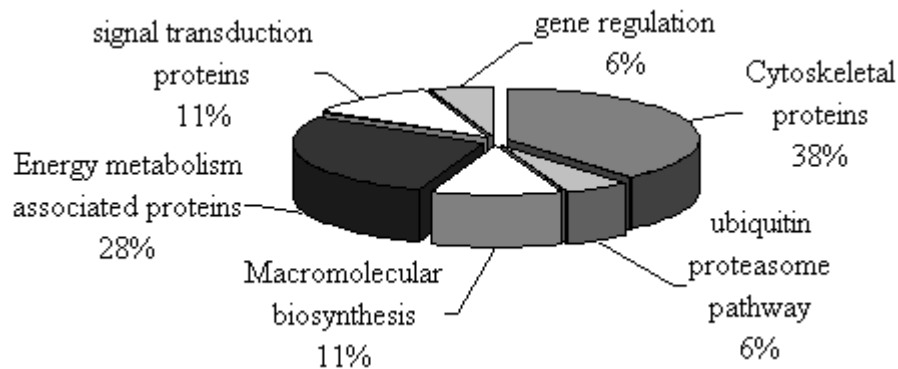

**B. Subcellular location of up-regulated protein spots**

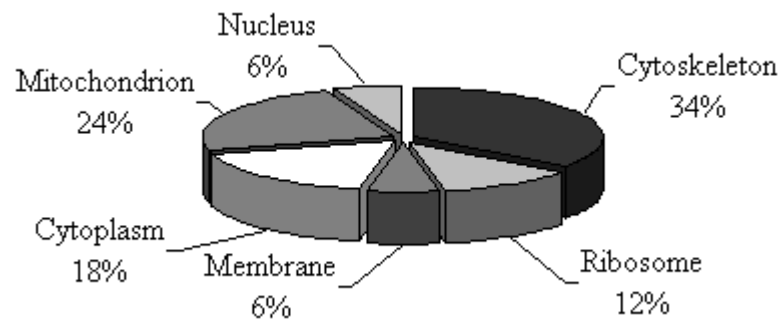

**C. Functional classification of down-regulated protein spots**

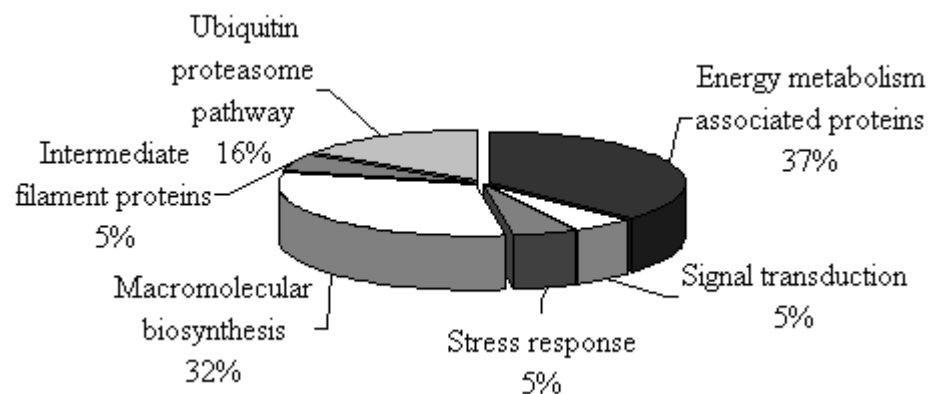

**D. Subcellular location of down-regulated protein spots**

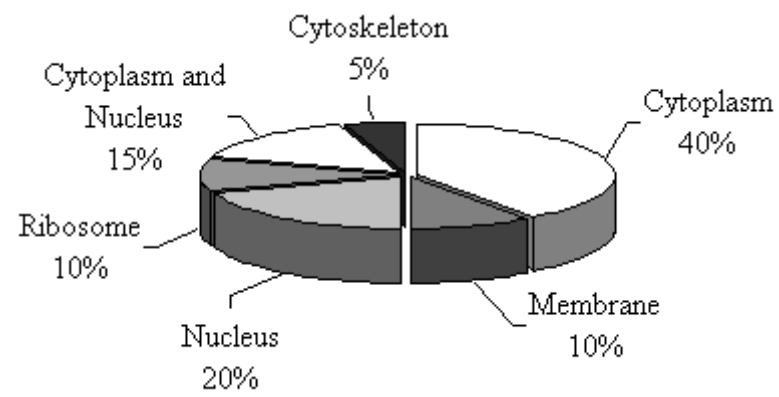

Supplement: Supplementary file 1 [file 4512487]
